# Supplementary material for: Heterostructural MnO2@NiS2/Ni(OH)2 materials for high-performance pseudocapacitor electrodes
Source: Royal Society of Chemistry journal article supplement (doi:10.1039/c7ra06569h), 2017-01-01
Supplement: c7ra06569h1.pdf [file c7ra06569h1.pdf]

**Supporting Information:**

**Heterostructure MnO<sub>2</sub>@NiS<sub>2</sub>/Ni(OH)<sub>2</sub> materials  
for high-performance pseudocapacitor  
electrodes**

*Ying Ji,<sup>a</sup> Wei Liu,<sup>a</sup> Ziqing Zhang,<sup>a</sup> Ying Wang,<sup>a</sup> Xudong Zhao,<sup>a</sup> Benxian Li,<sup>a</sup> Xiaofeng  
Wang,<sup>\*a</sup> Xiaoyang Liu,<sup>\*a</sup> Bingbing Liu<sup>b</sup> and Shouhua Feng<sup>a</sup>*

- <sup>a.</sup> State Key Laboratory of Inorganic Synthesis and Preparative Chemistry, College of Chemistry, Jilin University, 2699 Qianjin Street, Changchun 130012, P. R. China.
- <sup>b.</sup> State Key Laboratory of Superhard Materials, College of Chemistry, Jilin University, 2699 Qianjin Street, Changchun 130012, P. R. China.

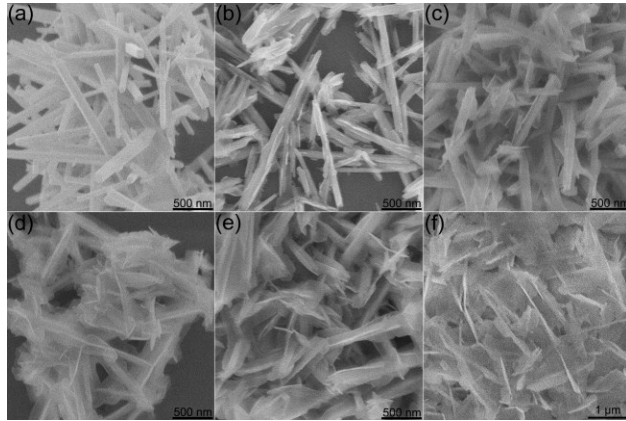

**Fig. S1.** SEM images of the  $\text{MnO}_2@\text{NiS}_2/\text{Ni}(\text{OH})_2$  heterostructure materials synthesized with 2 h (a), 4 h (b), 6 h (c), 8 h (d), 12 h (e), and 24 h (f).

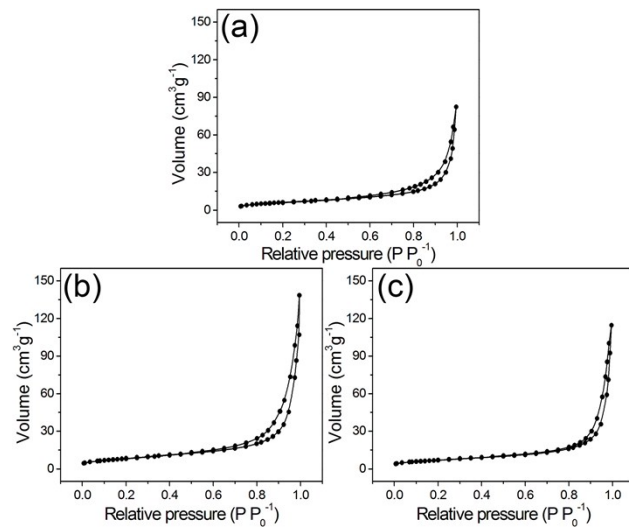

**Fig. S2.** The  $\text{N}_2$  absorption-desorption isotherms of the  $\text{MnO}_2@\text{NiS}_2/\text{Ni}(\text{OH})_2$  heterostructure materials synthesized with 4 h (a), 12 h (b), and 24 h (c).

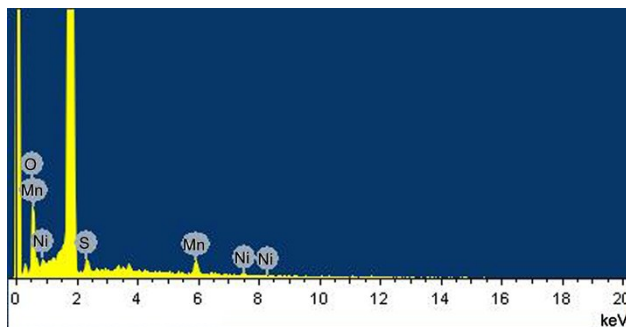

**Fig. S3.** EDX spectrum of  $\text{MnO}_2@\text{NiS}_2/\text{Ni}(\text{OH})_2$  heterostructure materials synthesized with 12 h.

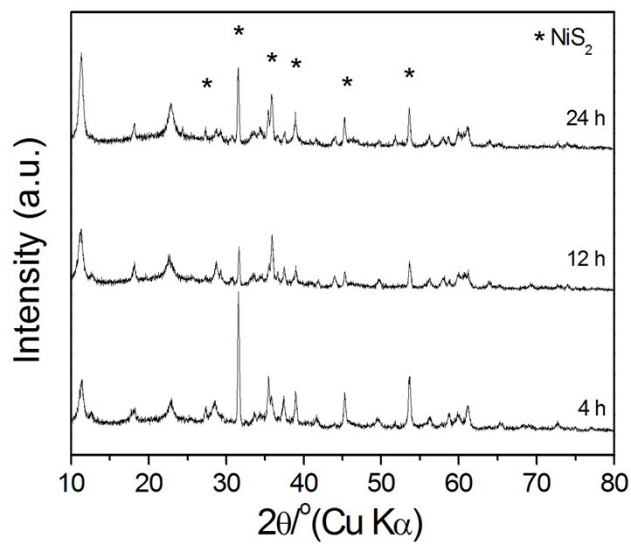

**Fig. S4.** XRD pattern of the heterostructured  $\text{MnO}_2@\text{NiS}_2/\text{Ni}(\text{OH})_2$  with different reaction time, 4 h, 12 h and 24 h.

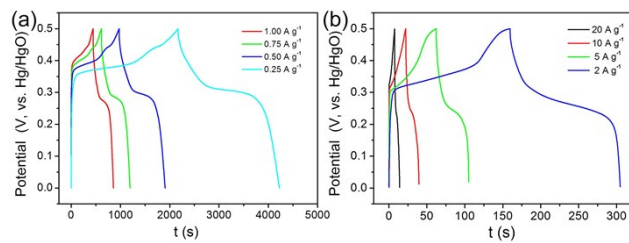

**Fig. S5.** Galvanostatic charge-discharge curves with different current densities of MnO<sub>2</sub>@NiS<sub>2</sub>/Ni(OH)<sub>2</sub>.
